# Supplementary material for: Evaluation of droplet deposition parameters based on the Genetic-Otsu algorithm
Source: PeerJ journal article supplement (doi:10.7717/peerj.18036), 2024-09-18
Supplement: Raw_data.zip [file Coverage.xlsx]

## Sheet: Sheet1
number	Pixels	Fixed	Fixed+Closing	OTSU	OTSU+closing	gentic+OTSU	Gentic+OTSU+closing	manually	error(%)	error(%)	error(%)	error(%)	error(%)	error(%)
1	4139509	50943	52669	52414	53886	52417	52808	52814	3.54262	0.274548	0.757375	2.02976	0.751695	0.0113606
2	4004105	91296	93889	92446	94839	91297	94643	89782	1.68631	4.57441	2.96719	5.63253	1.68742	5.41423
3	3965396	104715	107848	104715	107848	104712	107104	111012	5.67236	2.85014	5.67236	2.85014	5.67506	3.52034
4	4206568	44438	46139	44438	46139	44437	45460	46536	4.50834	0.853103	4.50834	0.853103	4.51049	2.31219
5	4134801	19873	20612	20137	20823	20256	20633	20529	3.19548	0.404306	1.90949	1.43212	1.32983	0.5066
6	4010520	9028	9428	9513	9861	9580.64	9772	9623	6.1831	2.0264	1.14309	2.47324	0.440195	1.54837
7	4092660	18216	18672	20460	20875	20463	18980	19072	4.48826	2.09732	7.27768	9.45365	7.29341	0.482383
8	4110120	19701	20057	20155	20470	20155	20362	20558	4.16869	2.43701	1.96031	0.428057	1.96031	0.9534
9	4139460	121844	124104	119013	121607	119013	119132	124037	1.76802	0.0540161	4.0504	1.95909	4.0504	3.95447
10	4117763	50183	51506	48980	50562	48245	50014	50841	1.29423	1.308	3.66043	0.54877	5.10612	1.62664
11	4035146	25328	26021	24694	25559	24696	25436	25853	2.03071	0.649828	4.48304	1.1372	4.4753	1.61297
12	4060170	17176	17858	16949	17671	17048	17255	17182	0.0349203	3.93435	1.35607	2.846	0.779886	0.424863
13	4206612	20750	21648	21244	22020	21245	21882	21409	3.07814	1.11635	0.770704	2.85394	0.766033	2.20935
14	4021809	56905	58170	57214	58419	56905	57950	58269	2.34087	0.169902	1.81057	0.257427	2.34087	0.547461
15	4141875	113583	116780	112985	116272	112974	115447	117167	3.05888	0.330298	3.56926	0.763867	3.57865	1.46799
16	4025970	17902	18575	20239	20783	19965	19313	19277	7.13285	3.64165	4.9904	7.81242	3.56902	0.186751
17	4188952	99035	103147	100423	104240	101115	103772	104633	5.35013	1.4202	4.02359	0.375599	3.36223	0.822876
18	3984985	18391	19564	21213	22242	20920	21823	20877	11.9078	6.28922	1.60943	6.5383	0.205968	4.5313
19	4079732	49239	51972	52343	54774	52333	53377	53852	8.56607	3.49105	2.80212	1.7121	2.82069	0.882047
20	3920670	61262	63510	62523	64621	62518	65987	63780	3.94795	0.42333	1.97084	1.3186	1.97868	3.46033
21	4138134	65034	70833	72378	77237	72370	74964	74888	13.1583	5.41475	3.35167	3.13668	3.36235	0.101485
22	3933336	35394	36805	37224	38421	37213	38018	38925	9.07129	5.44637	4.36994	1.2948	4.3982	2.33012
23	4098470	51622	53639	55166	57023	55165	55034	55648	7.23476	3.61019	0.866159	2.47089	0.867956	1.10336
24	4139509	50943	52669	52414	53886	52756	52522	52936	3.76492	0.504383	0.986096	1.79462	0.340033	0.782076
25	3913434	15582	16469	16117	16904	16123	16277	16769	7.07854	1.78902	3.88813	0.805057	3.85235	2.93399
26	3919104	33567	35556	35027	36679	34733	37235	37755	11.0926	5.82439	7.22553	2.84995	8.00424	1.3773
27	4111248	52131	53544	52402	53745	52133	53404	52995	1.63034	1.03595	1.11897	1.41523	1.62657	0.771771
28	4060980	51370	52935	51606	53130	51606	52619	52385	1.93758	1.04992	1.48707	1.42216	1.48707	0.446693
29	4071088	50546	51750	49773	51094	49769	50425	50659	0.22306	2.15362	1.74895	0.858683	1.75684	0.461912
30	4038912	64436	66615	68273	70548	68255	69015	70075	8.04709	4.93757	2.57153	0.674991	2.59722	1.51267
31	4053000	101049	103975	99342	102663	99334	101409	103519	2.38604	0.440499	4.03501	0.826901	4.04274	2.03827
32	4157860	179107	183404	179107	183404	179997	182700	181377	1.25154	1.11756	1.25154	1.11756	0.760846	0.72942
33	4190697	313597	322485	313597	322485	318388	333176	331643	5.44139	2.7614	5.44139	2.7614	3.99677	0.462244
34	4030508	207557	215542	207557	215542	208905	212875	214033	3.0257	0.705031	3.0257	0.705031	2.39589	0.541038
35	4233924	433044	454109	426906	448778	426899	440187	446872	3.0944	1.61948	4.46795	0.42652	4.46951	1.49595
36	4092669	245948	253855	245948	253855	245938	251231	249292	1.3414	1.83038	1.3414	1.83038	1.34541	0.777803
37	3959270	146478	151543	147413	152243	146472	150818	150609	2.74286	0.620149	2.12205	1.08493	2.74685	0.13877
38	4164090	112993	116956	114629	118448	114622	114520	114681	1.47191	1.98376	0.0453432	3.28476	0.0514471	0.140389
39	4093810	282653	290152	282653	290152	282618	287377	289519	2.37152	0.218639	2.37152	0.218639	2.38361	0.739848
40	4074252	360967	373105	358661	371057	363095	365684	365712	1.29747	2.02154	1.92802	1.46153	0.71559	0.0076563
41	3788522	149234	155662	151543	157545	162386	155467	157480	5.23622	1.15443	3.77	0.0412751	3.11532	1.27826
42	3942468	226396	236777	227915	238071	233058	234269	235970	4.0573	0.341993	3.41357	0.890367	1.23406	0.720854
43	4071483	394259	410764	387446	405619	387432	400362	401377	1.7734	2.3387	3.4708	1.05686	3.47429	0.252879
44	4000806	229560	236729	240406	247045	238149	241454	244020	5.92574	2.98787	1.48103	1.23965	2.40595	1.05155
45	4093606	367884	380222	359328	372929	361469	370272	367678	0.0560273	3.41168	2.27101	1.42815	1.68871	0.705509
46	4136240	221002	227530	218256	225204	218255	214924	217013	1.83814	4.84625	0.572777	3.77443	0.572316	0.962615
47	4138134	287081	296736	287081	296736	287071	290804	290074	1.03181	2.29666	1.03181	2.29666	1.03525	0.25166
48	4028674	356884	369062	356884	369062	359199	364695	361968	1.40454	1.95984	1.40454	1.95984	0.764985	0.753382
49	3959270	146478	151543	147413	152243	155231	150818	151457	3.2874	0.0567818	2.67006	0.518959	2.4918	0.421902
50	3978992	297599	309623	295514	307743	295514	302858	302837	1.72964	2.24081	2.41813	1.62001	2.41813	0.00693442
51	4030508	207557	215542	207557	215542	207565	223330	217485	4.56491	0.893395	4.56491	0.893395	4.56123	2.68754
52	3942468	226396	236777	227915	238071	227914	234269	241126	6.10884	1.80362	5.47888	1.26697	5.47929	2.84374
53	3820832	288014	301214	292083	304586	292074	300504	308194	6.54782	2.26481	5.22755	1.17069	5.23047	2.49518
54	4036788	238977	252650	246632	258853	248504	262633	261850	8.73515	3.51346	5.81172	1.14455	5.09681	0.299026
55	4162977	239725	250332	248124	257761	248119	255474	256094	6.39179	2.24996	3.11214	0.650933	3.11409	0.242099
56	4090984	177174	185285	178401	186321	178401	182421	180709	1.95618	2.53225	1.27719	3.10555	1.27719	0.947379
57	3788522	149234	155662	151543	157545	151535	155467	154430	3.36463	0.797772	1.86946	2.0171	1.87464	0.671502
58	4180680	172562	175495	171307	174311	173735	170681	169435	1.84555	3.57659	1.10485	2.8778	2.53785	0.735385
59	4118247	208711	215315	206426	213356	206422	211206	208563	0.0709618	3.23739	1.02463	2.29811	1.02655	1.26724
60	4001712	212829	219494	218978	225107	218953	222185	223836	4.91744	1.93981	2.17034	0.567826	2.18151	0.737594
61	3950208	1071949	1108846	1028339	1066363	1014700	1046770	1057909	1.32715	4.81488	2.79514	0.799124	4.08438	1.05293
62	4043751	1239725	1296070	1174219	1235363	1208286	1208286	1215033	2.03221	6.66953	3.35909	1.67321	0.555294	0.555294
63	4072884	870485	910205	838315	880473	838311	867972	873633	0.360334	4.1862	4.04266	0.782937	4.04312	0.647984
64	3972068	603477	620342	577761	596296	577760	588152	587995	2.63302	5.50124	1.74049	1.41175	1.74066	0.0267009
65	4010912	712577	736503	682216	708713	677950	694551	699610	1.85346	5.27337	2.48624	1.30115	3.09601	0.723117
66	3836308	695042	718828	666927	693526	662947	680161	676606	2.72478	6.24026	1.43052	2.50072	2.01875	0.525417
67	3813851	913912	944774	867537	901502	867534	886876	897576	1.82001	5.25838	3.34668	0.4374	3.34701	1.1921
68	3936042	1354493	1397061	1262649	1308906	1270192	1296490	1311635	3.26752	6.51294	3.73473	0.208061	3.15964	1.15467
69	4117068	638575	658407	614365	637702	610877	630003	633212	0.846952	3.97892	2.97641	0.709083	3.52725	0.506781
70	4185230	630741	651399	614792	636525	626569	626569	633438	0.425772	2.83548	2.94362	0.487341	1.0844	1.0844
71	4105416	906832	941830	869155	905281	884137	887999	921852	1.62933	2.16716	5.71643	1.79758	4.09122	3.67228
72	4247328	656996	679751	635730	659951	649163	638498	649487	1.15614	4.65968	2.11813	1.61112	0.0498855	1.69195
73	4055365	449776	467478	440448	460165	453726	451906	453562	0.834726	3.06816	2.89134	1.45581	0.0361582	0.36511
74	4187808	694876	717815	673760	698455	682055	677953	688029	0.995162	4.32918	2.0739	1.51534	0.868277	1.46447
75	4164186	750928	775944	731346	757883	736141	745281	750569	0.0478304	3.38077	2.56112	0.974461	1.92227	0.704532
76	4011095	433052	450733	436743	454173	440938	444350	446512	3.01448	0.945327	2.18785	1.71574	1.24834	0.484198
77	3879680	1117828	1175451	1043719	1098369	1043703	1083102	1100793	1.54752	6.7822	5.18481	0.220205	5.18626	1.60711
78	4079832	710250	739071	685890	719765	685867	707325	716738	0.905212	3.11592	4.30394	0.42233	4.30715	1.31331
79	4085667	474379	482743	466818	475713	466811	460481	468653	1.2218	3.00649	0.391548	1.50645	0.393041	1.74372
80	4138314	414192	421043	406364	413551	406364	407048	409933	1.03895	2.7102	0.87063	0.882583	0.87063	0.703774
81	4087916	752817	789573	729969	769862	715795	743917	753698	0.11689	4.75986	3.14834	2.14463	5.02894	1.29773
82	4042000	726180	749254	693050	716772	704230	709455	722719	0.478886	3.67155	4.10519	0.822865	2.55826	1.83529
83	4010150	1075941	1122891	998259	1045208	1025880	1027160	1069080	0.641767	5.03339	6.62448	2.23295	4.04086	3.92113
84	3911270	670697	698814	635666	663544	635746	649519	655883	2.25863	6.54553	3.08241	1.16804	3.07021	0.970295
85	3858988	781376	816338	737118	773041	737121	759716	764490	2.20879	6.78204	3.58043	1.11852	3.58003	0.624469
86	3976497	1326752	1398714	1220623	1294512	1220607	1258846	1275659	4.00522	9.64639	4.31432	1.4779	4.31557	1.31799
87	3990372	1110859	1169624	1033912	1096554	1033836	1068511	1087467	2.15105	7.5549	4.92475	0.835612	4.93174	1.74313
88	4137043	712886	738259	692512	720488	692508	709772	699855	1.86196	5.48742	1.04922	2.94818	1.04979	1.41701
89	4273399	563126	576658	550941	565288	538636	556780	550940	2.21186	4.66802	0.000181508	2.60428	2.23327	1.06001
90	4040274	433473	447236	433473	447236	433449	441710	438982	1.25495	1.88026	1.25495	1.88026	1.26042	0.621438
