# Supplementary material for: Evaluation of droplet deposition parameters based on the Genetic-Otsu algorithm
Source: PeerJ journal article supplement (doi:10.7717/peerj.18036), 2024-09-18
Supplement: Raw_data.zip [file Density.xlsx]

## Sheet: Sheet1
number	fixed	OTSU	gentic+OTSU	manually	error(%)	error(%)	error(%)
1	255	310	343	349	26.9341	11.1748	1.7192
2	437	488	504	509	14.1454	4.12574	0.982318
3	355	411	421	414	14.2512	0.724638	1.69082
4	175	230	206	200	12.5	15	3
5	144	181	182	177	18.6441	2.25989	2.82486
6	140	189	192	186	24.7312	1.6129	3.22581
7	81	123	125	122	33.6066	0.819672	2.45902
8	143	162	161	158	9.49367	2.53165	1.89873
9	377	424	423	449	16.0356	5.56793	5.79065
10	175	217	228	235	25.5319	7.65957	2.97872
11	113	132	134	138	18.1159	4.34783	2.89855
12	119	155	155	151	21.1921	2.64901	2.64901
13	158	202	204	197	19.797	2.53807	3.5533
14	264	293	295	304	13.1579	3.61842	2.96053
15	415	460	470	480	13.5417	4.16667	2.08333
16	176	262	263	260	32.3077	0.769231	1.15385
17	526	571	593	600	12.3333	4.83333	1.16667
18	305	431	447	424	28.066	1.65094	5.42453
19	429	513	527	545	21.2844	5.87156	3.30275
20	230	269	292	286	19.5804	5.94406	2.0979
21	730	851	898	931	21.5897	8.59291	3.54458
22	326	380	382	391	16.624	2.8133	2.30179
23	492	585	583	595	17.3109	1.68067	2.01681
24	255	310	335	322	20.8075	3.72671	4.03727
25	120	185	198	192	37.5	3.64583	3.125
26	279	336	361	368	24.1848	8.69565	1.90217
27	194	234	236	241	19.5021	2.90456	2.07469
28	166	254	258	248	33.0645	2.41935	4.03226
29	216	233	234	230	6.08696	1.30435	1.73913
30	580	662	689	657	11.7199	0.761035	4.87062
31	397	422	434	443	10.3837	4.74041	2.0316
32	584	616	638	656	10.9756	6.09756	2.7439
33	1105	1136	1208	1238	10.7431	8.2391	2.42326
34	1114	1256	1305	1362	18.2085	7.78267	4.18502
35	2064	2167	2334	2422	14.7812	10.5285	3.63336
36	1011	1078	1122	1181	14.3946	8.72142	4.99577
37	635	686	696	713	10.9397	3.78682	2.38429
38	559	651	641	635	11.9685	2.51969	0.944882
39	972	1042	1077	1117	12.9812	6.71441	3.58102
40	1489	1581	1664	1659	10.2471	4.70163	0.301386
41	1075	1280	1318	1326	18.9291	3.46908	0.603318
42	1379	1551	1629	1650	16.4242	6	1.27273
43	1348	1374	1454	1468	8.17439	6.40327	0.953678
44	1306	1452	1495	1515	13.7954	4.15842	1.32013
45	1422	1473	1557	1594	10.7905	7.59097	2.3212
46	882	947	980	971	9.16581	2.47168	0.92688
47	1670	1913	2059	2034	17.8958	5.94887	1.22911
48	1560	1677	1776	1777	12.2116	5.62746	0.0562746
49	635	686	696	707	10.1839	2.9703	1.55587
50	1568	1765	1852	1806	13.1783	2.27021	2.54707
51	1114	1256	1389	1398	20.3147	10.1574	0.643777
52	1379	1551	1629	1625	15.1385	4.55385	0.246154
53	1638	1772	1858	1915	14.4648	7.46736	2.9765
54	1263	1389	1512	1533	17.6125	9.39335	1.36986
55	1600	1767	1867	1852	13.6069	4.58963	0.809935
56	1022	1155	1203	1228	16.7752	5.94463	2.03583
57	1075	1280	1318	1306	17.6876	1.99081	0.918836
58	492	565	550	540	8.88889	4.62963	1.85185
59	624	695	728	715	12.7273	2.7972	1.81818
60	1440	1562	1615	1621	11.1659	3.63973	0.370142
61	2539	2473	2770	2880	11.8403	14.1319	3.81944
62	2938	2864	3349	3465	15.2092	17.3449	3.34776
63	2828	2863	3192	3135	9.79266	8.67624	1.81818
64	2368	2490	2644	2698	12.2313	7.70941	2.00148
65	2836	2931	3134	3247	12.6578	9.73206	3.48014
66	2713	2771	2960	2958	8.28262	6.32184	0.0676133
67	2520	2531	2804	2913	13.4912	13.1136	3.74185
68	2007	2028	2266	2340	14.2308	13.3333	3.16239
69	2196	2259	2379	2489	11.7718	9.24066	4.41945
70	2151	2183	2369	2409	10.7098	9.38149	1.66044
71	3648	3769	4093	4061	10.1699	7.19035	0.787983
72	3190	3392	3610	3677	13.2445	7.75088	1.82214
73	1356	1429	1560	1520	10.7895	5.98684	2.63158
74	2366	2467	2626	2618	9.62567	5.76776	0.305577
75	2838	2963	3228	3249	12.65	8.80271	0.646353
76	2239	2338	2518	2590	13.5521	9.72973	2.77992
77	3684	3673	4088	4072	9.52849	9.79862	0.392927
78	1736	1768	1908	1989	12.72	11.1111	4.0724
79	1104	1200	1233	1211	8.83567	0.90834	1.81668
80	1114	1157	1206	1227	9.20945	5.70497	1.71149
81	2448	2461	2720	2789	12.2266	11.7605	2.47401
82	2902	2967	3231	3293	11.8737	9.89979	1.88278
83	3479	3460	3966	3865	9.98706	10.4787	2.6132
84	3754	4022	4093	4079	7.96764	1.3974	0.343221
85	3533	3605	4070	4073	13.258	11.4903	0.0736558
86	3015	2939	3598	3623	16.7817	18.8794	0.690036
87	3349	3332	3914	4063	17.5732	17.9916	3.66724
88	2448	2543	2736	2835	13.6508	10.2998	3.49206
89	1678	1738	1876	1893	11.3576	8.18806	0.898045
90	1756	1886	1959	1963	10.5451	3.92257	0.20377
